# Supplementary material for: Diel cycle impacts on the chemical and light absorption properties of organic carbon aerosol from wildfires in the western United States
Source: Copernicus journal article supplement (doi:10.5194/acp-21-11843-2021), 2021-08-09
Supplement: Supplementary file 1 [file acp-21-11843-2021-supplement.pdf]

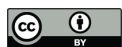

*Supplement of*

## **Diel cycle impacts on the chemical and light absorption properties of organic carbon aerosol from wildfires in the western United States**

**Benjamin Sumlin et al.**

*Correspondence to:* Benjamin Sumlin ([bsumlin@wustl.edu](mailto:bsumlin@wustl.edu)) and Rajan K. Chakrabarty ([chakrabarty@wustl.edu](mailto:chakrabarty@wustl.edu))

The copyright of individual parts of the supplement might differ from the article licence.

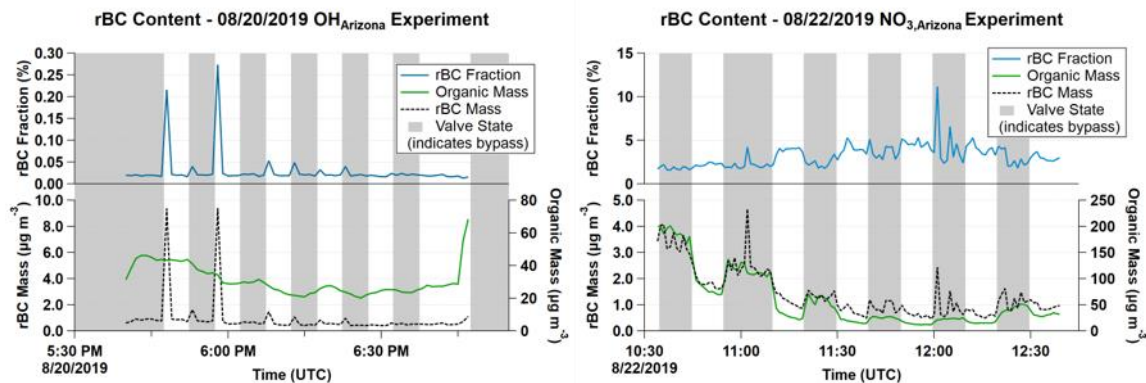

Figure S1: rBC fraction (top, blue), rBC (bottom, dashed black, left axis) and organic mass concentrations (bottom, green, right axis) for both Arizona experiments.

5

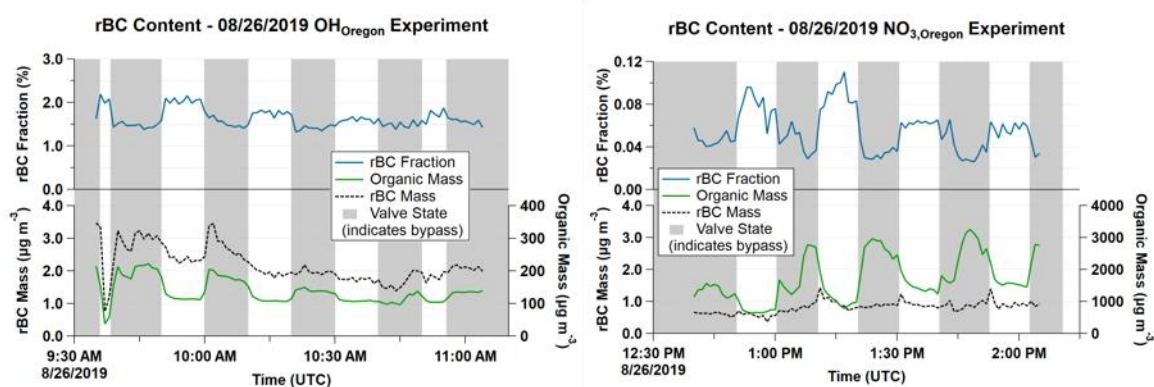

Figure S2: rBC fraction (top, blue), rBC (bottom, dashed black, left axis) and organic mass concentrations (bottom, green, right axis) for both Oregon experiments.

# $\text{NO}_{3,\text{Arizona}}$ Experiment Timeline

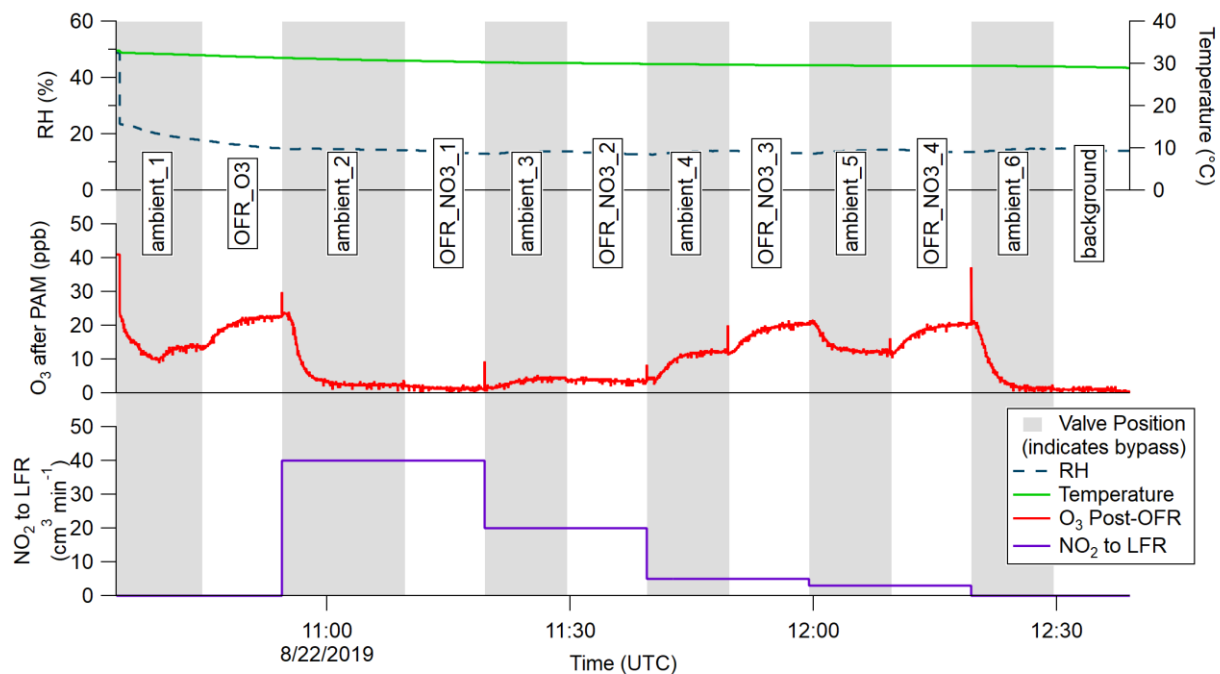

**Figure S3:** The timeline of the  $\text{NO}_{3,\text{Arizona}}$  experiment showing relative humidity, temperature, ozone post-OFR, and  $\text{NO}_2$  concentration flowing to the LFR. The gray bars indicate when the bypass valve was engaged and ambient aerosol was being analyzed. Each step is labeled for reference.

# OH<sub>Arizona</sub> Experiment Timeline

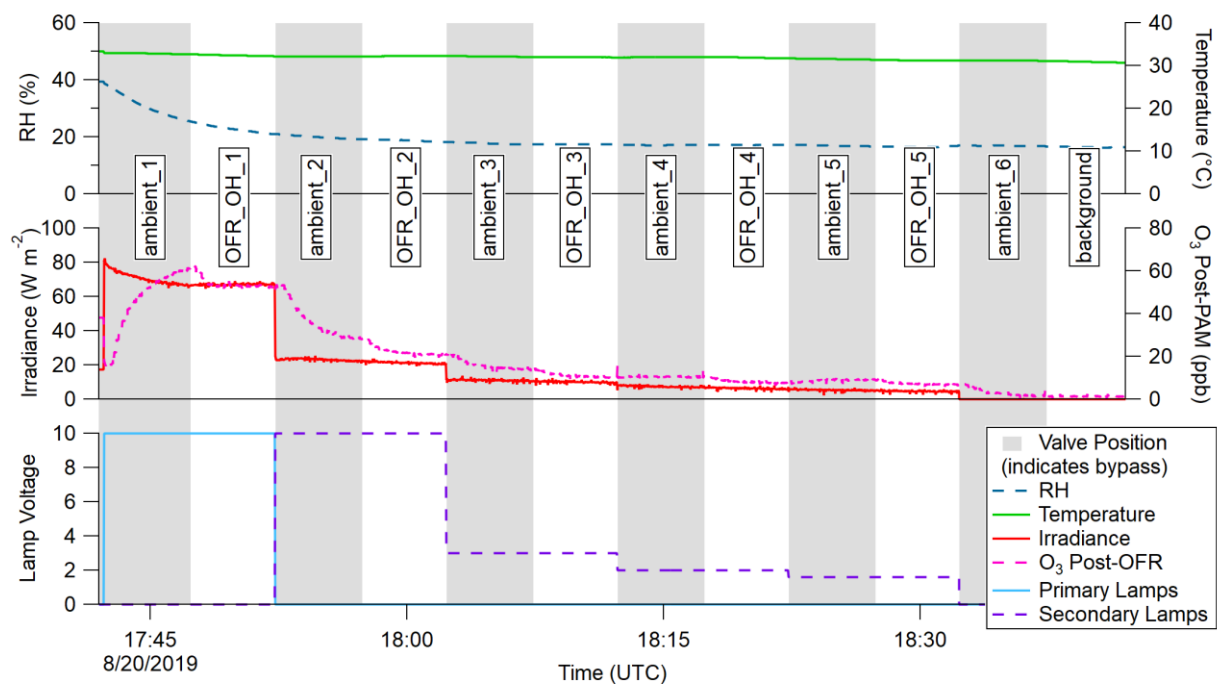

**Figure S4:** The timeline of the OH<sub>Arizona</sub> experiment showing relative humidity, temperature, 185 nm irradiance, ozone post-OFR, and voltages applied to the ballasts of both sets of lamps. The gray bars indicate when the bypass valve was engaged and ambient aerosol was being analyzed. Each step is labeled for reference.

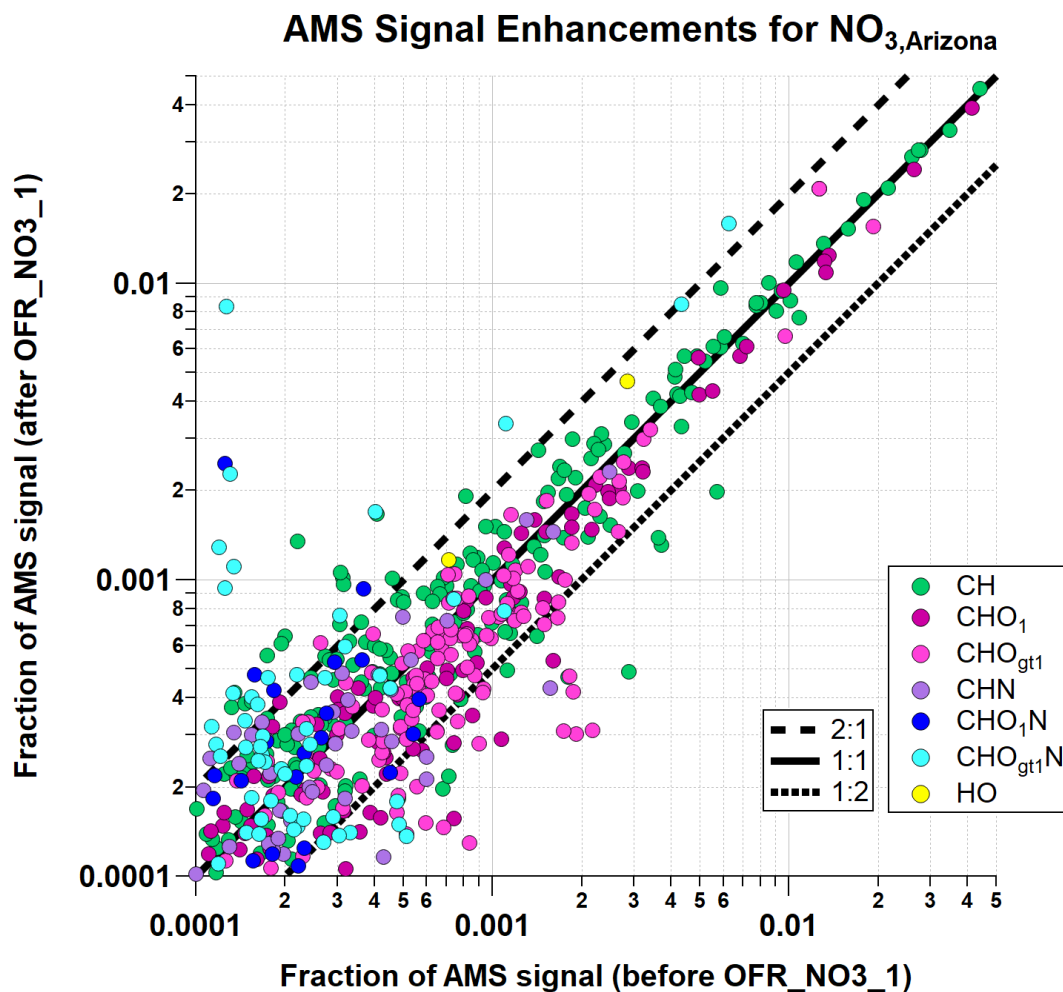

Figure S5: Scatterplot of enhancement and depletion of ions measured by the AMS before and after OFR\_NO<sub>3</sub>\_1 during the 22 August experiment in Arizona. The ion families with the highest enhancement are the nitrogenated hydrocarbons (CHO<sub>1</sub>N and CHO<sub>gt1</sub>N, dark and light blue, respectively), while the most depleted species are the non-nitrogenated hydrocarbons (CHO<sub>1</sub> and CHO<sub>gt1</sub>, purple and pink, respectively). The solid black line is the 1:1 line, above which indicates enhancement. The 2:1 and 1:2 lines are also given for convenience.

# AMS Signal Enhancements for NO<sub>3</sub>, Arizona

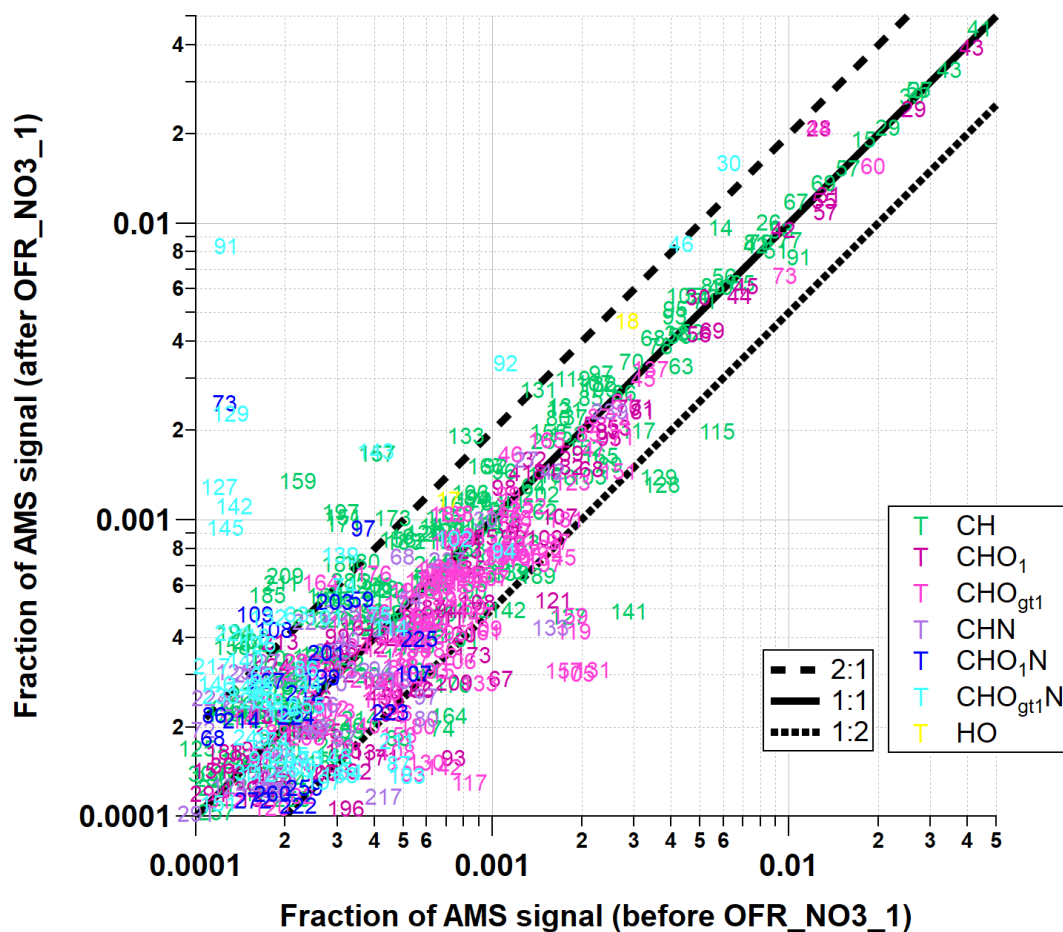

Figure S6: As with Figure S5, showing individual *m/z*.

## SP-AMS Signal Enhancements for OH<sub>Arizona</sub>

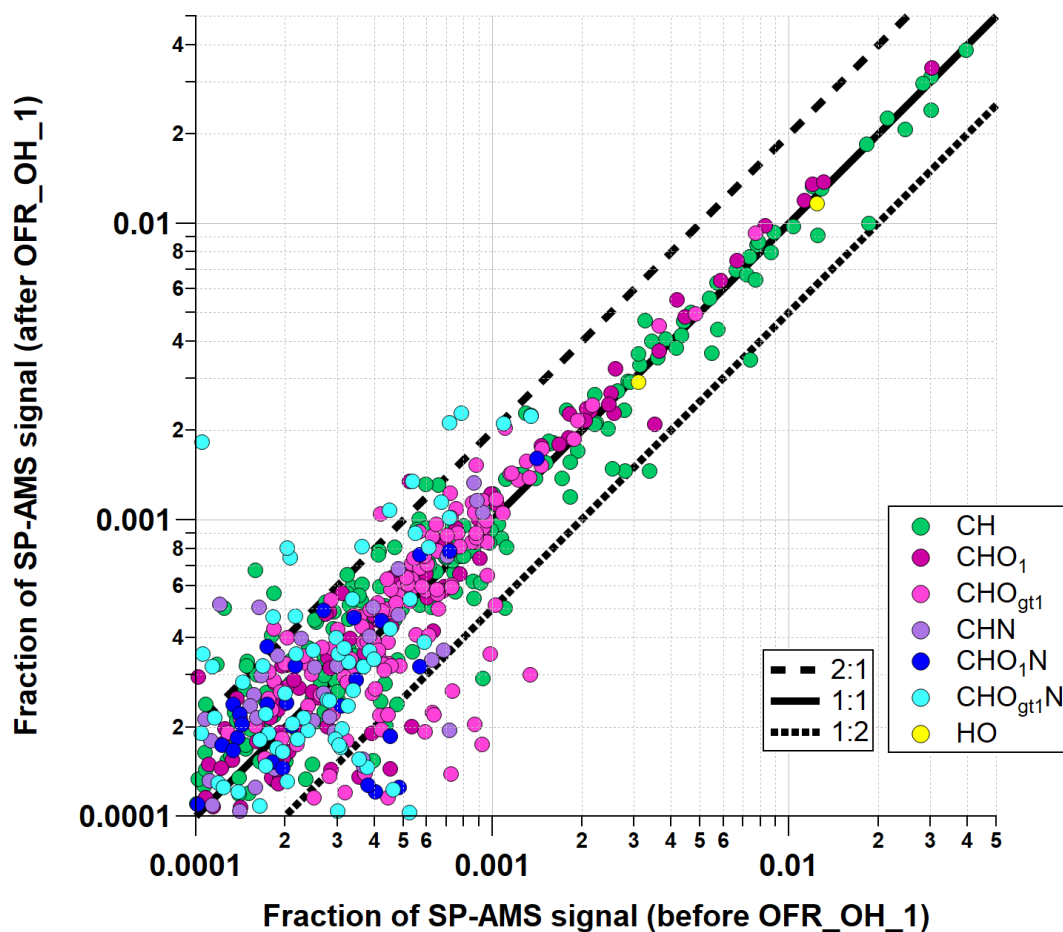

Figure S7: Scatterplot of enhancement and depletion of ions measured by the SP-AMS before and after OFR\_OH\_1 during the 20 August experiment in Arizona. The ion family with the highest enhancement is still the nitrogenated hydrocarbons with more than one oxygen atom (CHO<sub>gt1</sub>N, light blue), though the most depleted species are the nitrogenated hydrocarbons with a single oxygen atom (CHO<sub>1</sub>N, blue). The solid black line is the 1:1 line, above which indicates enhancement. The 2:1 and 1:2 lines are also given for convenience.

# SP-AMS Signal Enhancements for OH<sub>Arizona</sub>

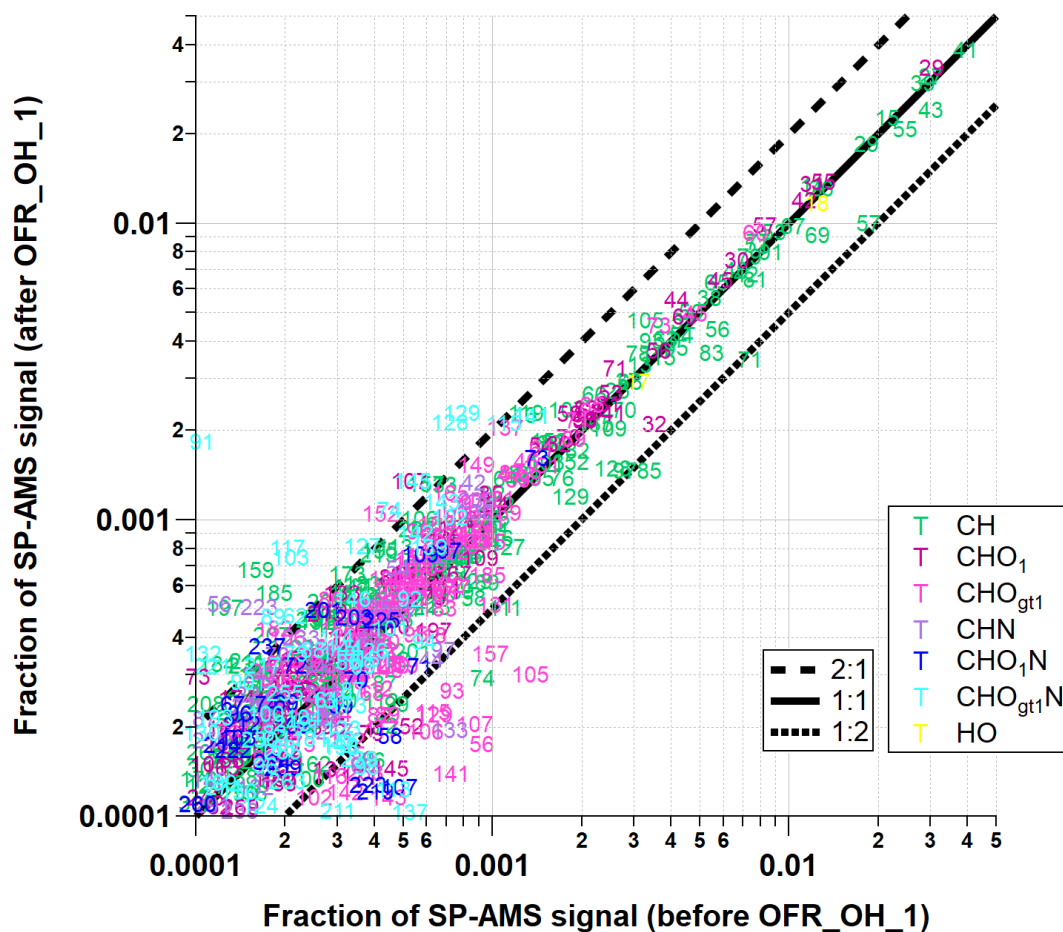

Figure S8: As with Figure S7, showing individual *m/z*.



**Table S1: Fit coefficients used in Eq. 1 (reproduced from Lambe et al. 2020).**

| Coefficient | Subspace 1<br>values | Subspace 2<br>values | Subspace 3<br>values |
|-------------|----------------------|----------------------|----------------------|
| <i>a</i>    | 61.0694              | −59.3835             | 246.416              |
| <i>b</i>    | −20.1400             | 27.3434              | −122.229             |
| <i>c</i>    | 0.795209             | 0.803508             | 0.581443             |
| <i>d</i>    | −0.375825            | 1.18285              | 51.2355              |
| <i>e</i>    | 0.031103             | 0.008157             | −0.66569             |
| <i>f</i>    | 0.888193             | −0.0731138           | −0.0210958           |
| <i>g</i>    | −0.379009            | 0.13199              | −0.346062            |
| <i>h</i>    | 1.73605              | −0.422009            | −81.9221             |
| <i>i</i>    | 0.14737              | 0.035132             | −22.4373             |
| <i>j</i>    | 0.261402             | 0.311104             | 13.204               |
| <i>k</i>    | −1.22009             | −0.323329            | −0.118988            |
| <i>l</i>    | 0.007336             | −0.004277            | 0.676436             |
| <i>m</i>    | −0.957064            | −0.436977            | −0.3983              |

40

**Table S2: Fit coefficients used in Eq. 2.**

| Coefficient | <i>a</i> | <i>b</i> | <i>c</i> | <i>d</i> | <i>e</i> | <i>f</i> |
|-------------|----------|----------|----------|----------|----------|----------|
| Value       | 10.098   | 0.15062  | −0.4424  | 0.18041  | 0.031146 | 0.1672   |
